# Supplementary material for: Doping effect of Sm on the TiO2/CeSmOx catalyst in the NH3-SCR reaction: structure–activity relationship, reaction mechanism and SO2 tolerance
Source: Royal Society of Chemistry journal article supplement (doi:10.1039/c9cy00731h), 2019-01-01

## Supporting Information

### **Doping effect of Sm on the TiO<sub>2</sub>/CeSmO<sub>x</sub> catalyst in the NH<sub>3</sub>-SCR reaction: Structure-Activity Relationship, Reaction Mechanism and SO<sub>2</sub> Tolerance**

Hao Liu<sup>a,b</sup>, Chuanzhi Sun<sup>a,b\*</sup>, Zhongxuan Fan<sup>a</sup>, XuanXuan Jia<sup>b</sup>, Jingfang Sun<sup>a</sup>, Fei Gao<sup>a</sup>, Changjin Tang<sup>a</sup>, Lin Dong<sup>a\*</sup>

<sup>a</sup> School of the Environment, Jiangsu Key Laboratory of Vehicle Emissions Control, Center of Modern Analysis, Nanjing University, Nanjing 210093, P.R. China

<sup>b</sup> College of Chemistry, Chemical Engineering and Materials Science, Shandong Provincial Key Laboratory of Clean Production of Fine Chemicals, Institute of Materials and Clean Energy, Shandong Normal University, Jinan 250014, P. R. China

\* To whom correspondence should be addressed. E-mail: [suncz@sdsu.edu.cn](mailto:suncz@sdsu.edu.cn); [donglin@nju.edu.cn](mailto:donglin@nju.edu.cn); Fax: 86-25-83317761

### **Preparation of Ti/Ce nanorod Catalyst**

CeO<sub>2</sub> nanorod support was prepared by a hydrothermal method. Ce(NO<sub>3</sub>)<sub>3</sub>·6H<sub>2</sub>O and NaOH were mixed together in deionized water under magnetic stirring. After that, the obtained suspension was put in a Teflon-lined stainless steel autoclave to react at different temperatures for 24 h. The hydrothermal reaction temperature and NaOH concentration were fixed at 100 °C and 6 M. Subsequently, the precipitate was centrifuged and washed until pH 7, and dried at 60 °C overnight in a vacuum oven. Finally, all of these supports were put in a muffle furnace and calcined at 450 °C for 3 h.

TiO<sub>2</sub>/CeO<sub>2</sub> nanorod catalyst was prepared by incipient wetness impregnation, according to *2.1. Catalyst preparation*.

**Fig. S1 TEM image of CeO<sub>2</sub>.**

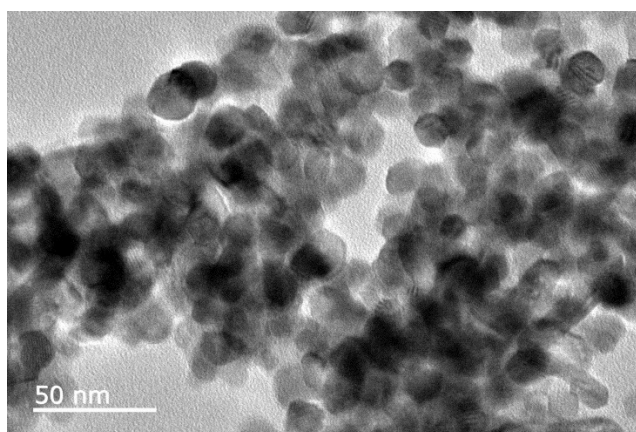

**Fig. S2.** The NH<sub>3</sub>-SCR activities of Ti/Ce catalysts with various mass ratio of Ti/Ce.

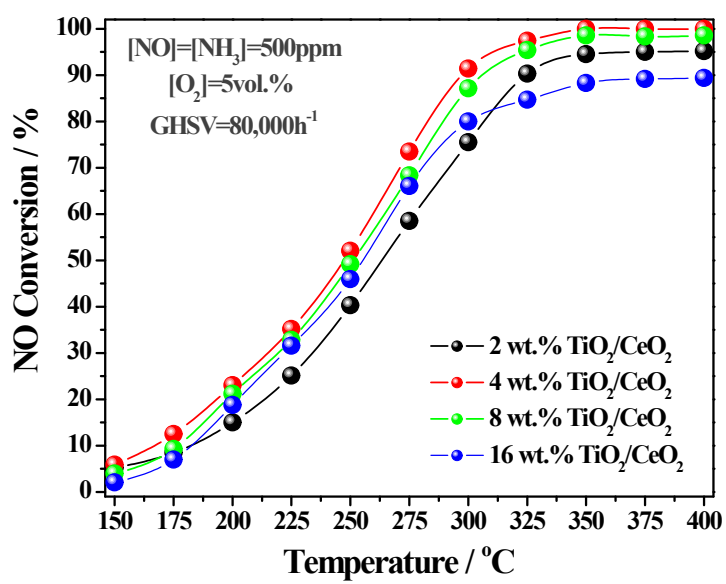

**Fig. S3.** NO conversion as a function of the reaction temperature in the NH<sub>3</sub>-SCR reaction over the Ti/Ce, Ti/CeSm and Ti/Ce-nanorod catalysts.

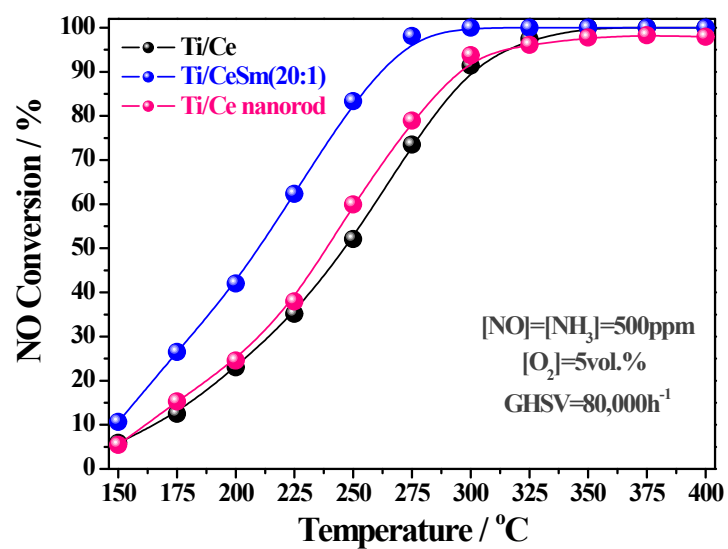

**Fig. S4.** FTIR results of Ti/Ce and Ti/CeSm(20:1) catalysts after enduring H<sub>2</sub>O and SO<sub>2</sub> test at 300°C.

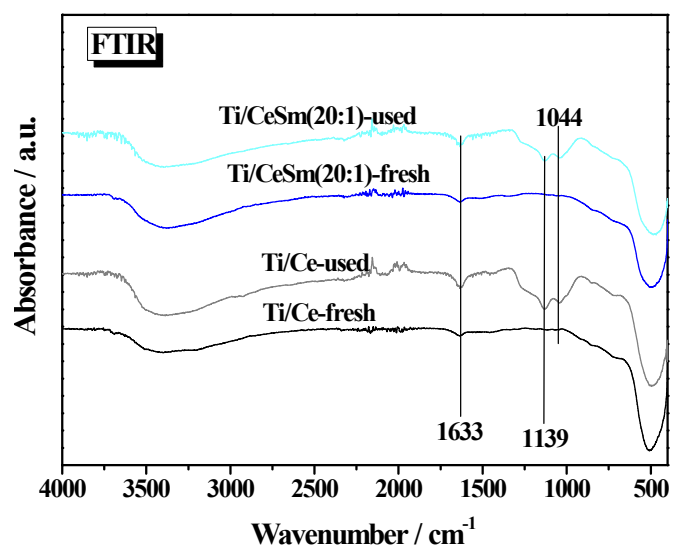

Supplement: c9cy00731h1.pdf [file c9cy00731h1.pdf]
